# Supplementary material for: Novel Gastric Cancer Stem Cell-Related Marker LINGO2 Is Associated with Cancer Cell Phenotype and Patient Outcome
Source: MDPI journal article supplement (doi:10.3390/ijms20030555), 2019-01-28
Supplement: s1 [file s1]

Supplementary Table 1. Differentially expressed genes in SNU484 and N87 sphere (Fold change=sphere/adherent)

| Gene symbol         | Fold Change (sphere/adh) |       | Gene name                                                                                 | Gene symbol         | Fold Change (sphere/adh) |        | Gene name                                                                      |
|---------------------|--------------------------|-------|-------------------------------------------------------------------------------------------|---------------------|--------------------------|--------|--------------------------------------------------------------------------------|
|                     | SNU484                   | N87   |                                                                                           |                     | SNU484                   | N87    |                                                                                |
| EDN3                | 8.36                     | 1.33  | endothelin 3                                                                              | RAB31               | -2.20                    | -9.21  | RAB31, member RAS oncogene family                                              |
| BAI3                | 6.11                     | 1.96  | brain-specific angiogenesis inhibitor 3                                                   | NAV2                | -2.21                    | -2.23  | neuron navigator 2                                                             |
| LRRN3               | 5.64                     | 1.68  | leucine rich repeat neuronal 3                                                            | CAV1                | -2.22                    | -3.80  | caveolin 1, caveolae protein, 22kDa                                            |
| CALB1               | 4.53                     | 1.23  | calbindin 1, 28kDa                                                                        | CD24                | -2.22                    | -9.20  | CD24 molecule                                                                  |
| KLHL1               | 4.49                     | 1.22  | kelch-like 1 (Drosophila)                                                                 | DDIT4               | -2.23                    | -1.30  | DNA-damage-inducible transcript 4                                              |
| LMO3                | 4.37                     | 1.50  | LIM domain only 3 (rhombotin-like 2)                                                      | SCIN                | -2.23                    | -1.63  | scinderin                                                                      |
| POSTN               | 4.26                     | 1.25  | periostin, osteoblast specific factor                                                     | FH                  | -2.24                    | -1.47  | fumarate hydratase                                                             |
| CHGB                | 4.19                     | 1.44  | chromogranin B (secretogranin 1)                                                          | IGFBP6              | -2.27                    | -1.82  | insulin-like growth factor binding protein 6                                   |
| FAT4                | 3.93                     | 1.44  | FAT tumor suppressor homolog 4 (Drosophila)                                               | EGFR                | -2.28                    | -1.91  | epidermal growth factor receptor                                               |
| CDH19               | 3.68                     | 1.78  | cadherin 19, type 2                                                                       | PROCR               | -2.28                    | -2.18  | protein C receptor, endothelial (EPCR)                                         |
| ADAM22              | 3.60                     | 1.32  | ADAM metalloproteinase domain 22                                                          | GRK6                | -2.30                    | -1.39  | G protein-coupled receptor kinase 6                                            |
| DSC1                | 3.43                     | 1.28  | desmocollin 1                                                                             | SH3BP4              | -2.32                    | -1.45  | SH3-domain binding protein 4                                                   |
| CSMD3               | 3.22                     | 1.39  | CUB and Sushi multiple domains 3                                                          | SOX9                | -2.33                    | -5.96  | SRY (sex determining region Y)-box 9                                           |
| GRAMD3              | 3.08                     | 1.65  | GRAM domain containing 3                                                                  | CBX5                | -2.36                    | -2.40  | Chromobox homolog 5 (HP1 alpha homolog, Drosophila)                            |
| CNTNAP3             | 2.98                     | 1.27  | contactin associated protein-like 3 /// contactin associated protein-like 3B              | AKAP12              | -2.36                    | -2.50  | A kinase (PRKA) anchor protein (gravin) 12                                     |
| <b>LINGO2</b>       | 2.95                     | 1.37  | Leucine rich repeat and Ig domain containing 2                                            | NNMT                | -2.38                    | -5.47  | nicotinamide N-methyltransferase                                               |
| MUC15               | 2.94                     | 1.21  | mucin 15, cell surface associated                                                         | PAPPA               | -2.38                    | -4.42  | pregnancy-associated plasma protein A, pappalysin 1                            |
| SYCP2               | 2.93                     | 1.69  | synaptonemal complex protein 2                                                            | SGK1                | -2.39                    | -1.93  | serum/glucocorticoid regulated kinase 1                                        |
| IGF1                | 2.92                     | 1.36  | insulin-like growth factor 1 (somatomedin C)                                              | COL1A1              | -2.39                    | -3.61  | collagen, type I, alpha 1                                                      |
| HGF                 | 2.85                     | 1.27  | hepatocyte growth factor (hepatopoietin A; scatter factor)                                | MDFIC               | -2.41                    | -1.69  | MyoD family inhibitor domain containing                                        |
| LRFN5               | 2.81                     | 2.48  | leucine rich repeat and fibronectin type III domain containing 5                          | SOC3                | -2.45                    | -1.72  | suppressor of cytokine signaling 3                                             |
| NEBL                | 2.77                     | 1.32  | Nebulette                                                                                 | NAV3                | -2.47                    | -2.22  | neuron navigator 3                                                             |
| FOLR1               | 2.76                     | 1.20  | folate receptor 1 (adult)                                                                 | DTNA                | -2.47                    | -1.27  | dystrobrevin, alpha                                                            |
| SCUBE3              | 2.69                     | 1.25  | signal peptide, CUB domain, EGF-like 3                                                    | FSTL3               | -2.47                    | -1.34  | folistatin-like 3 (secreted glycoprotein)                                      |
| PLXDC2              | 2.66                     | 1.30  | plexin domain containing 2                                                                | PSAT1               | -2.48                    | -1.33  | phosphoserine aminotransferase 1                                               |
| 11-3                | 2.62                     | 1.32  | membrane-associated ring finger (C3HC4) 11                                                | CD36                | -2.50                    | -3.78  | CD36 molecule (thrombospondin receptor)                                        |
| LIPA                | 2.61                     | 1.21  | lipase A, lysosomal acid, cholesterol esterase (Wolman disease)                           | GIGYF2              | -2.51                    | -2.11  | trinucleotide repeat containing 15                                             |
| PCDH9               | 2.61                     | 1.28  | protocadherin 9                                                                           | C10orf47            | -2.52                    | -1.70  | chromosome 10 open reading frame 47                                            |
| NLG1                | 2.55                     | 1.22  | neurogranin 1                                                                             | SPHK1               | -2.54                    | -1.72  | sphingosine kinase 1                                                           |
| CEP350              | 2.54                     | 1.29  | centrosomal protein 350kDa                                                                | 2orf59 /// LOC54147 | -2.57                    | -1.29  | chromosome 2 open reading frame 59 /// hypothetical LOC541471                  |
| LONP2               | 2.51                     | 2.34  | Seven in absentia homolog 1 (Drosophila)                                                  | SERPINF2            | -2.58                    | -16.28 | serpin peptidase inhibitor, clade B (ovalbumin), member 2                      |
| MALAT1              | 2.51                     | 1.44  | PRO1073 protein                                                                           | EFEMP1              | -2.61                    | -8.65  | EGF-containing fibulin-like extracellular matrix protein 1                     |
| BCL11A              | 2.48                     | 1.60  | B-cell CLL/lymphoma 11A (zinc finger protein)                                             | FAM84B              | -2.63                    | -2.96  | family with sequence similarity 84, member B                                   |
| ID4                 | 2.47                     | 2.45  | Inhibitor of DNA binding 4, dominant negative helix-loop-helix protein                    | PHLDA1              | -2.65                    | -1.26  | pleckstrin homology-like domain, family A, member 1                            |
| JAM2                | 2.46                     | 1.21  | junctional adhesion molecule 2                                                            | PSMB9               | -2.67                    | -8.96  | proteasome (prosome, macropain) subunit, beta type, 9                          |
| ID2 /// ID2B        | 2.43                     | 6.49  | inhibitor of DNA binding 2, dominant negative helix-loop-helix protein                    | C12orf39            | -2.68                    | -1.37  | chromosome 12 open reading frame 39                                            |
| KIAA2022            | 2.38                     | 1.33  | KIAA2022                                                                                  | GADD45B             | -2.72                    | -1.25  | growth arrest and DNA-damage-inducible, beta                                   |
| ANO3                | 2.38                     | 1.41  | transmembrane protein 16C                                                                 | SEPP1               | -2.73                    | -2.67  | selenoprotein P, plasma, 1                                                     |
| GPATCH2             | 2.37                     | 2.52  | G patch domain containing 2                                                               | ITGA2               | -2.74                    | -2.46  | integrin, alpha 2 (CD49B, alpha 2 subunit of VLA-2 receptor)                   |
| 100134366 /// PLGLA | 2.34                     | 3.20  | plasminogen-like B2 /// plasminogen-like B1 /// plasminogen-like A1                       | CLU                 | -2.77                    | -1.51  | clusterin                                                                      |
| DPY19L2             | 2.32                     | 1.72  | dpy-19-like 2 (C. elegans)                                                                | DKK3                | -2.82                    | -7.11  | dickkopf homolog 3 (Xenopus laevis)                                            |
| SUV420H1            | 2.32                     | 1.31  | suppressor of variegation 4-20 homolog 1 (Drosophila)                                     | PRSS23              | -2.83                    | -1.82  | protease, serine, 23                                                           |
| MSL-1               | 2.30                     | 1.42  | male-specific lethal-1 homolog                                                            | ABCF2               | -2.88                    | -1.60  | ATP-binding cassette, sub-family F (GCN20), member 2                           |
| SDC2                | 2.24                     | 1.86  | syndecan 2                                                                                | EMP1                | -2.91                    | -1.25  | epithelial membrane protein 1                                                  |
| HOMER1              | 2.23                     | 1.62  | homer homolog 1 (Drosophila)                                                              | QKI                 | -2.92                    | -1.21  | quaking homolog, KH domain RNA binding (mouse)                                 |
| P2RY1               | 2.21                     | 1.39  | purinergic receptor P2Y, G-protein coupled, 1                                             | PALLD               | -2.94                    | -1.86  | palladin, cytoskeletal associated protein                                      |
| TRIM73              | 2.21                     | 1.32  | tripartite motif-containing 73                                                            | MICB                | -2.99                    | -2.17  | MHC class I polypeptide-related sequence B                                     |
| PLAG1               | 2.21                     | 1.81  | pleiomorphic adenoma gene 1                                                               | CD55                | -3.04                    | -2.42  | CD55 molecule                                                                  |
| DHX9                | 2.19                     | 1.75  | DEAH (Asp-Glu-Ala-His) box polypeptide 9                                                  | MICAL2              | -3.05                    | -1.85  | microtubule associated monooxygenase, calponin and LIM domain containing 2     |
| FZD7                | 2.16                     | 1.37  | frizzled homolog 7 (Drosophila)                                                           | PTPRK               | -3.06                    | -1.75  | protein tyrosine phosphatase, receptor type, K                                 |
| TTC18               | 2.16                     | 1.33  | tetratricopeptide repeat domain 18                                                        | BIRC3               | -3.08                    | -1.98  | baculoviral IAP repeat-containing 3                                            |
| KDR                 | 2.16                     | 1.36  | kinase insert domain receptor (a type III receptor tyrosine kinase)                       | SLC16A6             | -3.11                    | -1.24  | solute carrier family 16, member 6 (monocarboxylic acid transporter 7)         |
| EPHA5               | 2.15                     | 1.36  | EPH receptor A5                                                                           | DST                 | -3.15                    | -1.37  | dystonin                                                                       |
| ZMAT1               | 2.15                     | 1.31  | zinc finger, matrix type 1                                                                | PLAU                | -3.18                    | -2.67  | plasminogen activator, urokinase                                               |
| C5orf13             | 2.15                     | 1.21  | chromosome 5 open reading frame 13                                                        | TM4SF1              | -3.19                    | -2.19  | transmembrane 4 L six family member 1                                          |
| COL21A1             | 2.12                     | 1.30  | collagen, type XXI, alpha 1                                                               | CYR61               | -3.24                    | -1.38  | cysteine-rich, angiogenic inducer, 61                                          |
| NUCB2               | 2.11                     | 1.21  | nucleobindin 2                                                                            | TFAP2C              | -3.29                    | -1.79  | transcription factor AP-2 gamma                                                |
| ZNF436              | 2.11                     | 1.79  | zinc finger protein 436                                                                   | ULBP2               | -3.31                    | -2.48  | UL16 binding protein 2                                                         |
| ARSD                | 2.10                     | 1.26  | arylsulfatase D                                                                           | SPOCK1              | -3.34                    | -2.14  | sparc/osteonectin, cwcv and kazal-like domains proteoglycan (testican) 1       |
| WDR52               | 2.04                     | 1.29  | WD repeat domain 52                                                                       | CAV2                | -3.37                    | -2.73  | caveolin 2                                                                     |
| AMH                 | 2.04                     | 3.13  | anti-Müllerian hormone                                                                    | COTL1               | -3.42                    | -2.29  | coactosin-like 1 (Dictyostelium)                                               |
| CPE                 | 2.03                     | 1.47  | carboxypeptidase E                                                                        | AADACL1             | -3.60                    | -1.60  | arylacetylamine deacetylase-like 1                                             |
| C3orf21             | 2.02                     | 1.28  | chromosome 3 open reading frame 21                                                        | TOX2                | -3.65                    | -3.25  | TOX high mobility group box family member 2                                    |
| SGSH                | 2.02                     | 1.30  | N-sulfoglucosamine sulfohydrolase (sulfamidase)                                           | SAMD9               | -3.76                    | -1.79  | sterile alpha motif domain containing 9                                        |
| MZF1                | 2.01                     | 1.38  | myeloid zinc finger 1                                                                     | FHL2                | -3.85                    | -2.55  | four and a half LIM domains 2                                                  |
| ARMCX3              | 2.01                     | 1.37  | armadillo repeat containing, X-linked 3                                                   | LOX                 | -3.93                    | -1.22  | lysyl oxidase                                                                  |
| ASNS                | -2.00                    | -1.25 | asparagine synthetase                                                                     | LAMP3               | -4.05                    | -1.81  | lysosomal-associated membrane protein 3                                        |
| AHNAK2              | -2.01                    | -1.86 | AHNAK nucleoprotein 2                                                                     | OBFC2A              | -4.25                    | -1.28  | oligonucleotide/oligosaccharide-binding fold containing 2A                     |
| PTK2                | -2.02                    | -2.79 | PTK2 protein tyrosine kinase 2                                                            | TNS3                | -4.38                    | -1.66  | tensin 3                                                                       |
| CRYZL1              | -2.02                    | -1.57 | crystallin, zeta (quinone reductase)-like 1                                               | ARHGAP29            | -4.49                    | -5.28  | Rho GTPase activating protein 29                                               |
| CND1                | -2.03                    | -1.38 | cyclin D1                                                                                 | NOX4                | -4.58                    | -1.33  | NADPH oxidase 4                                                                |
| LY6E                | -2.04                    | -1.23 | lymphocyte antigen 6 complex, locus E                                                     | DOCK10              | -4.65                    | -1.70  | dedicator of cytokinesis 10                                                    |
| CCL5                | -2.04                    | -2.41 | chemokine (C-C motif) ligand 5                                                            | THBS1               | -4.66                    | -1.54  | thrombospondin 1                                                               |
| F2R                 | -2.05                    | -6.84 | coagulation factor II (thrombin) receptor                                                 | SLC6A15             | -4.88                    | -4.71  | solute carrier family 6, member 15                                             |
| FOXF1               | -2.06                    | -5.27 | forkhead box F1                                                                           | PHLDA2              | -4.98                    | -1.54  | pleckstrin homology-like domain, family A, member 2                            |
| SNCA                | -2.07                    | -1.68 | synuclein, alpha (non A4 component of amyloid precursor)                                  | NTSE                | -5.21                    | -7.42  | 5'-nucleotidase, ecto (CD73)                                                   |
| CLIC3               | -2.08                    | -1.56 | chloride intracellular channel 3                                                          | MYO10               | -5.36                    | -1.84  | myosin X                                                                       |
| TRIP10              | -2.08                    | -1.26 | thyroid hormone receptor interactor 10                                                    | ARL4C               | -5.82                    | -1.21  | ADP-ribosylation factor-like 4C                                                |
| FGF2                | -2.10                    | -1.31 | fibroblast growth factor 2 (basic)                                                        | CXCL1               | -5.89                    | -1.84  | chemokine (C-X-C motif) ligand 1 (melanoma growth stimulating activity, alpha) |
| CLDN1               | -2.10                    | -1.90 | Claudin 1                                                                                 | F2RL1               | -6.61                    | -11.89 | coagulation factor II (thrombin) receptor-like 1                               |
| PRPS1               | -2.10                    | -1.50 | phosphoribosyl pyrophosphate synthetase 1                                                 | CALD1               | -6.61                    | -1.33  | caldesmon 1                                                                    |
| kazrin              | -2.11                    | -1.54 | kazrin                                                                                    | RBM24               | -6.82                    | -2.92  | RNA binding motif protein 24                                                   |
| KCNH4               | -2.12                    | -2.92 | potassium intermediate/small conductance calcium-activated channel, subfamily H, member 4 | GEM                 | -7.68                    | -1.81  | GTP binding protein overexpressed in skeletal muscle                           |
| CDKN2AIPNL          | -2.13                    | -1.63 | CDKN2A interacting protein N-terminal like                                                | DNER                | -10.62                   | -2.52  | delta/notch-like EGF repeat containing                                         |
| PDLM7               | -2.13                    | -1.38 | PDZ and LIM domain 7 (enigma)                                                             | SRPX                | -13.04                   | -4.94  | sushi-repeat-containing protein, X-linked                                      |
| SWAP70              | -2.13                    | -1.59 | SWAP-70 protein                                                                           | IL8                 | -16.30                   | -2.26  | interleukin 8                                                                  |
| KLF5                | -2.13                    | -1.25 | Kruppel-like factor 5 (intestinal)                                                        | MMP1                | -17.72                   | -3.23  | matrix metalloproteinase 1 (interstitial collagenase)                          |
| SAT1                | -2.16                    | -2.16 | spermidine/spermine N1-acetyltransferase 1                                                | ETS1                | -22.11                   | -1.74  | v-ets erythroblastosis virus E26 oncogene homolog 1 (avian)                    |
| EMP3                | -2.18                    | -1.50 | epithelial membrane protein 3                                                             | C15orf48            | -22.70                   | -1.34  | chromosome 15 open reading frame 48                                            |

**Supplementary Table 2. Primer Sequences Used For RT-PCR**

| Gene             | Forward                | Reverse                |
|------------------|------------------------|------------------------|
| <i>JAG2</i>      | GTGGATGTCGACCTTTGTGA   | GGCAGTCGTCAATGTTCTCA   |
| <i>Notch3</i>    | ATGGTGGGAACATAACACAGCT | ATGACCCTGGAGGAAGCACA   |
| <i>HES1</i>      | GTGCTGTCTGGATGCGGAGT   | GAACACTCACACTCAAAGCCC  |
| <i>IHH</i>       | CCTGAACCTCGCTGGCTATCT  | AATACACCCAGTCAAAGCCG   |
| <i>SMO</i>       | GAATCGCTACCCTGCTGTTA   | TGAGCAGGTGGAAGTAGGAG   |
| <i>GLI1</i>      | AGAGTCCAGGGGGTTACATA   | CCTACCAGAGTCCCAAGTTT   |
| <i>FZD7</i>      | CCAACGGCCTGATGTACTTT   | GCCATGCCGAAGAAGTAGAG   |
| <i>β-Catenin</i> | GTATGAGTGGGAACAGGGATT  | CCTGGTCCTCGTCATTTAGC   |
| <i>NANOG</i>     | ACTGTCTCTCCTCTTCCTCCT  | AGAGTAAAGGCTGGGGTAGGTA |
| <i>OCT4</i>      | GTGGAGGAAGCTGACAACAA   | AGCAGCCTCAAAATCCTCTC   |
| <i>PTEN</i>      | GGACGAACTGGTGTAATGAT   | CAGACCACAACTGAGGATT    |
| <i>β-Actin</i>   | GGCATCCTCACCTGAAGTA    | GGGGTGTTGAAGGTCTCAAA   |
