# Supplementary figures and images for: Novel Gastric Cancer Stem Cell-Related Marker LINGO2 Is Associated with Cancer Cell Phenotype and Patient Outcome
Source: MDPI journal article supplement (doi:10.3390/ijms20030555), 2019-01-28

Supplementary Figure 2

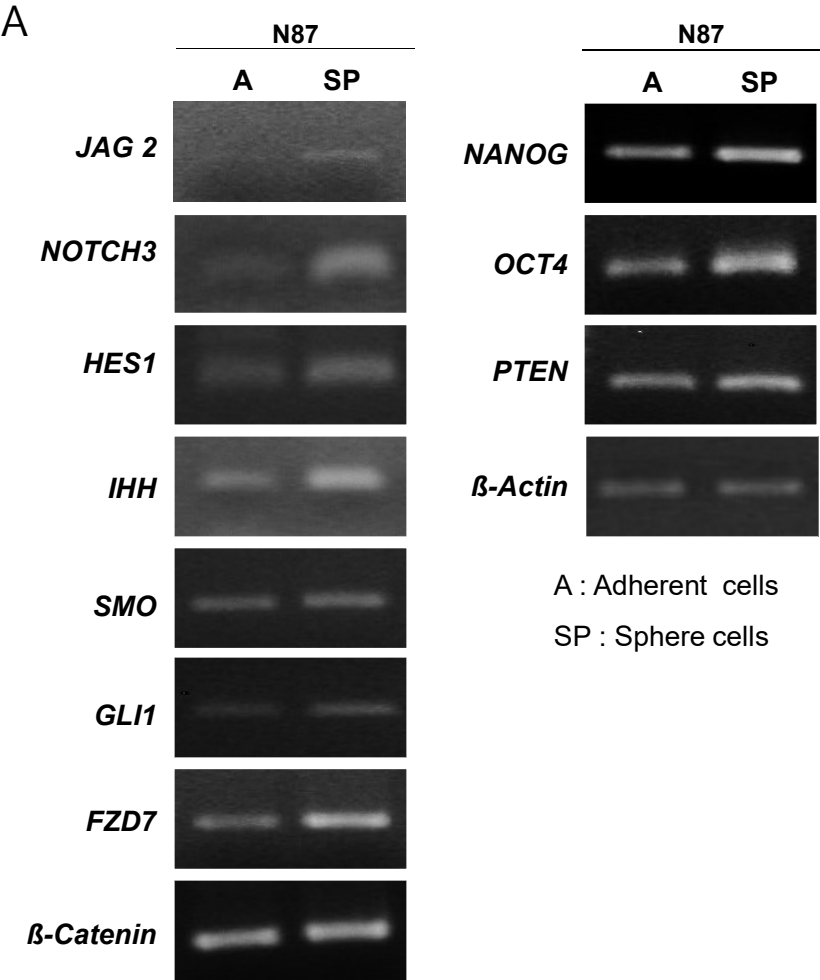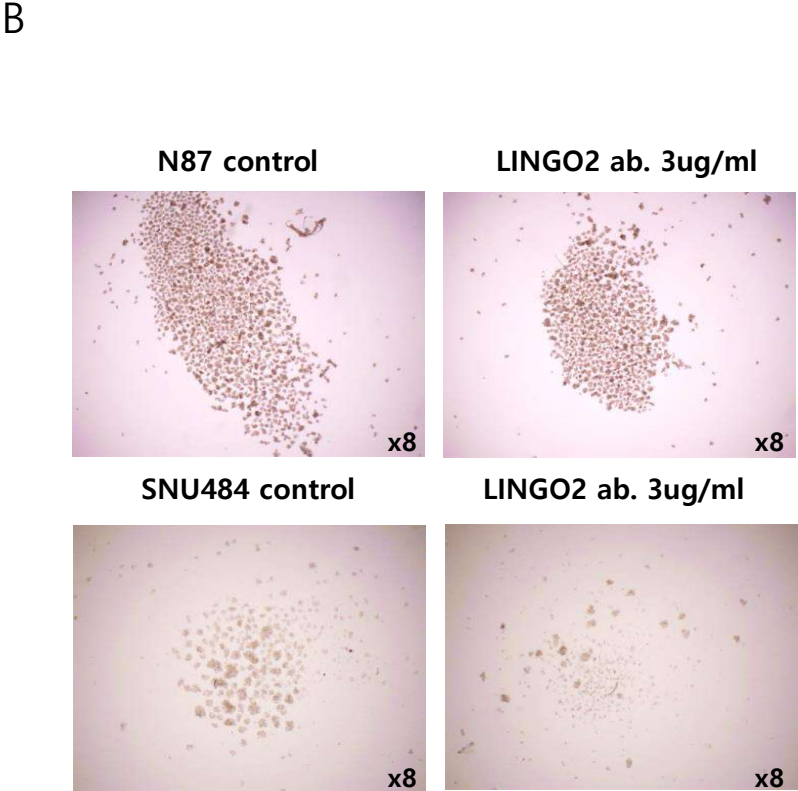

Supplementary Figure 3

A

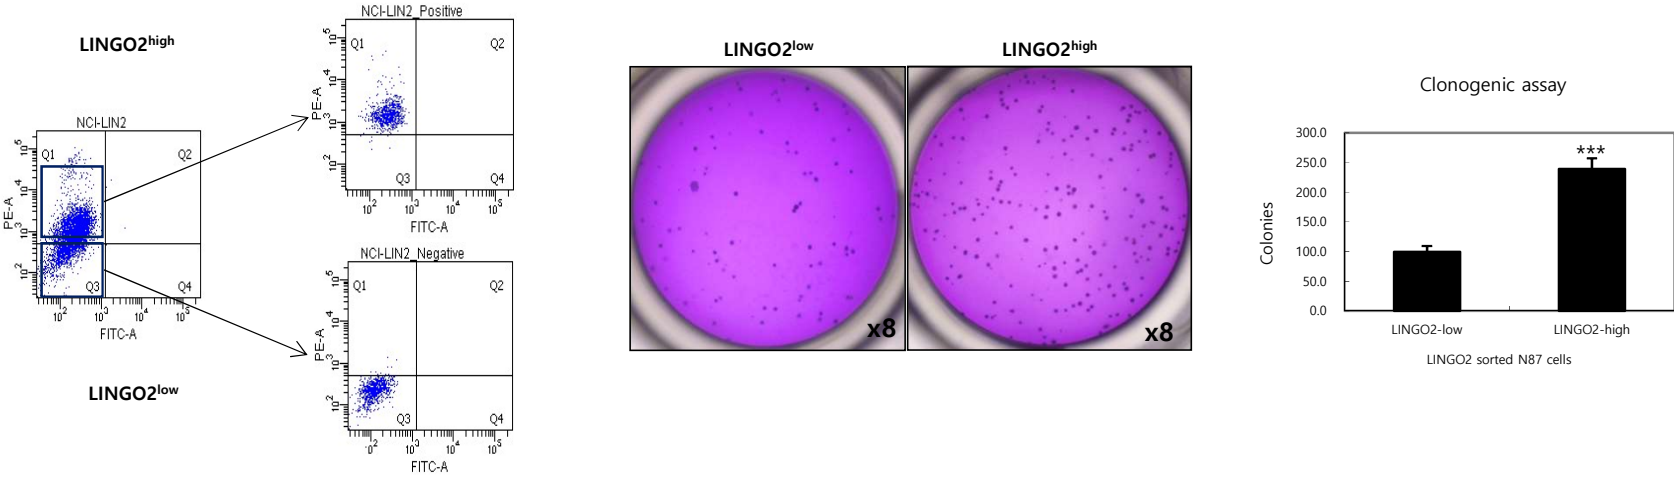

Supplementary Figure 4

A

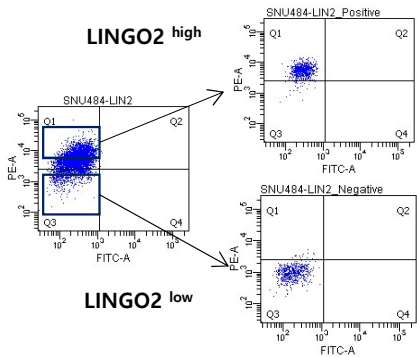

B

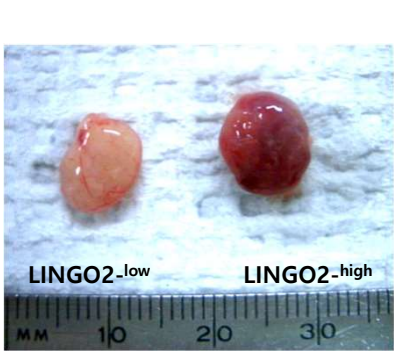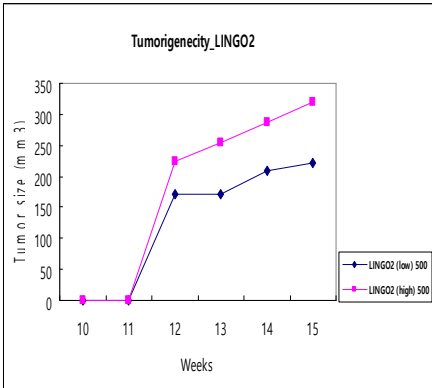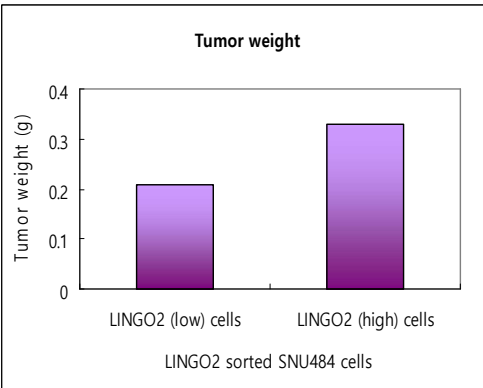

Supplement: s1 [file s1]
